1 **Evaluation of serum antibodies against SARS-CoV-2 in healthcare workers who participated**

2 **in the operation of charter flights for the evacuation of Japanese residents from Hubei**

3 **Province**

4

5 Tetsuya Suzuki, M.D.<sup>1,2</sup>, Kayoko Hayakawa, M.D., Ph.D.<sup>1</sup>, Akira Ainai, Ph.D.<sup>3</sup>, Naoko

6 Iwata-Yoshikawa, D.V.M., Ph.D.<sup>3</sup>, Kaori Sano, D.V.M., Ph.D.<sup>3</sup>, Noriyo Nagata, D.V.M., Ph.D.<sup>3</sup>,

7 Tadaki Suzuki, M.D., Ph.D.<sup>3</sup>, Yuji Wakimoto, M.D.<sup>1</sup>, Yutaro Akiyama, M.D.<sup>1</sup>, Yusuke Miyazato,

8 M.D.<sup>1</sup>, Keiji Nakamura, M.D.<sup>1</sup>, Satoshi Ide, M.D.<sup>1,2</sup>, Hidetoshi Nomoto, M.D.<sup>1,2</sup>, Takato Nakamoto,

9 M.D.<sup>1</sup>, Masayuki Ota, M.D.<sup>1</sup>, Yuki Moriyama, M.D.<sup>1,2</sup>, Yuko Sugiki, R.N.<sup>4,5</sup>, Sho Saito, M.D.<sup>1,2</sup>,

10 Shinichiro Morioka, M.D.<sup>1,2</sup>, Masahiro Ishikane, M.D., Ph.D.<sup>1</sup>, Noriko Kinoshita, M.D.<sup>1,2</sup>, Satoshi

11 Kutsuna, M.D., Ph.D.<sup>1</sup>, Norio Ohmagari, M.D., M.Sc., Ph.D.<sup>1,2</sup>

12

13 1) Disease Control and Prevention Center, National Center for Global Health and Medicine, Tokyo,

14 Japan.

15 2) Emerging and Reemerging Infectious Diseases, Graduate School of Medicine, Tohoku University,

16 Sendai, Japan.

17 3) Department of Pathology, National Institute of Infectious Diseases, Tokyo, Japan

18 4) Infection Control Team, National Center for Global Health and Medicine, Tokyo, Japan

19 5) Department of Nursing, National Center for Global Health and Medicine, Tokyo, Japan

20 **Key words:** COVID-19; personal protective equipment; serum antibody; infection control

21 **Running head:** SARS-CoV-2 antibodies in healthcare workers

22 **Corresponding Author:**

23 Tetsuya Suzuki

24 Disease Control and Prevention Center

25 National Center for Global Health and Medicine, Tokyo, Japan

26 1-21-1 Toyama, Shinjuku-ku, Tokyo 162-8655, Japan

27 Tel: +81-3-3202-7181

28 Fax: +81-3-3207-1038

29 E-mail: [tesuzuki@hosp.ncgm.go.jp](mailto:tesuzuki@hosp.ncgm.go.jp)

30

31 **Summary**

32 There are several recommendations for the use of personal protective equipment (PPE) against  
33 severe acute respiratory syndrome coronavirus 2 (SARS-CoV-2) infection. However, the selection of  
34 appropriate PPE for the current situation remains controversial. We measured serum antibody titers  
35 for SARS-CoV-2 in 10 participants who were engaged in the operation of charter flights for the  
36 evacuation of Japanese residents from Hubei Province. All participants wore PPE in accordance with  
37 Centers for Disease Control and Prevention guidelines. A total of 17 samples were tested, and all  
38 were seronegative. Hence, we conclude that the current PPE recommendation is effective to protect  
39 healthcare workers from SARS-CoV-2 infection.

40

41 **Text**

42 Although there are several recommendations for personal protective equipment (PPE) against the  
43 severe acute respiratory syndrome coronavirus 2 (SARS-CoV-2) infection (1, 2), the selection of  
44 appropriate PPE according to the current situation remains a matter of debate. There are reports on  
45 the incidence of coronavirus disease (COVID-19) among healthcare workers (3), which puts them  
46 under tremendous stress. The National Center for Global Health and Medicine (NCGM) helped the  
47 operation of charter flights for the evacuation of Japanese residents from Hubei Province from the  
48 end of January to mid-February 2020 (4). In the present study, we evaluated the efficacy of PPE  
49 against SARS-CoV-2 infection among hospital staff who were engaged in the operation of charter  
50 flights by measuring their serum antibody levels. In addition, we used a questionnaire for  
51 self-evaluation of the PPE wearing status.

52 Hospital staff who participated in the operation were recruited for this study. All staff wore  
53 PPE, which includes N95 mask, gown, gloves, disposable cap, and eye protection, in accordance  
54 with the Centers for Disease Control and Prevention (CDC) guidelines. The details of this operation  
55 are provided in a previous report (4). The doctor who collected the pharyngeal swab had used a  
56 coverall to minimize the risk of body surface contamination due to infected secretions and droplets.  
57 Enhanced hand hygiene using an alcohol-based hand sanitizer was practiced.

58 Blood samples were collected at enrollment (after February 14th) and at every 2 weeks after  
59 enrollment until 4 weeks after the final participation in the evacuation operation. At enrollment,  
60 participants were asked to answer the web-form self-reporting questionnaire about their PPE and  
61 their compliance. This study was reviewed and approved by the Ethics Committee of the Center  
62 Hospital of National Center for Global Health and Medicine. Written informed consent was obtained  
63 from all participants.

64 Serum antibody titers were measured using a two-step assay. First, samples were screened  
65 using enzyme-linked immunosorbent assay (ELISA). Positive samples were then re-examined, by

66 neutralization assay, for the presence or absence of specific antibodies against SARS-CoV-2. The  
67 details of this method have been reported previously (5). The participants of the previous study  
68 and this present study are not overlapped.

69 Japanese government-chartered aircrafts were operated on 3 times in January and twice in  
70 February, 2020. The number of people who were screened at our hospital on the respective dates was  
71 199, 197, 140, 194, and 63, respectively. The number of positive cases was 3 (1), 2 (3), 2 (1), 1, and  
72 0, respectively (numbers in parentheses indicate the number of people whose results were initially  
73 negative from the samples obtained at NCGM but later became positive) (6-9). Thus, the final chance  
74 for participants to come in contact with COVID-19 patients was in early February, but two  
75 participants had other chances of occupational exposure to COVID-19 in February.

76 Ten healthcare workers (2 nurses, 5 doctors, and 3 clerical staff) were enrolled. Five of them  
77 were male. Eight participants responded to a web-form questionnaire. Their characteristics are listed  
78 in Table 1. Among those who answered the questionnaire, 4 were in their 40s, 3 were in their 30s,  
79 and 1 was in his/her 50s. Their median compliance with PPE was 90% (range 70-100%, n=8). A total  
80 of 17 blood samples were collected from 10 participants. Of them, 8 had their first samples collected  
81 around late February, 2020. Before blood sampling, 25% of them (n=2/8) noticed some respiratory  
82 symptoms. Six participants underwent more than 2 blood samplings at intervals of approximately 2  
83 weeks. Five samples from 2 participants tested positive on ELISA screening, but none of them  
84 remained positive after the neutralization assay. Thus, all samples from all participants were  
85 seronegative.

86 We conclude that healthcare workers who participated in the operation of charter flights for  
87 the evacuation of Japanese residents from Hubei Province, China, were seronegative for  
88 SARS-CoV-2. Thus, PPE in accordance with the CDC guidelines is effective in protecting healthcare  
89 staff from COVID-19. Along with previous studies (10, 11), these results suggest that appropriate  
90 PPE prevents healthcare workers from contracting COVID-19. The unique aspects of our study are

91 as follows: (a) participants included clerical staff who are usually not familiar with the use of PPE  
92 and (b) a short period of training would enable them to use PPE appropriately. In addition, to  
93 maximize the sensitivity and specificity, we used a careful, two-step evaluation for the serostatus.

94 In our study, the first blood sample was obtained between late February and early March,  
95 2020. Because there were no laboratory-confirmed COVID-19 patients in the 5<sup>th</sup> flight, their final  
96 potential exposure was on early February, 2020. The duration was sufficient to attain a seropositive  
97 status, if the infection was established among the participants (12).

98 There are some limitations to this study. First, recall bias is inevitable because the  
99 questionnaire used was self-reporting. Second, compared to inpatient care, opportunities for exposure  
100 to COVID-19 cases were less intense in this cohort. Third, the setting of this study is different from  
101 the routine medical exposure, and thus, the results of our study might not be adaptable to clinical  
102 practice.

103 In conclusion, this study demonstrates the effectiveness of PPE in protecting a wide range of  
104 healthcare workers from being infected with SARS-CoV-2. Sufficient PPE supply for healthcare staff  
105 is essential to avoid the spread of nosocomial infections. Further studies including a large number of  
106 participants are required to support and validate the effectiveness of PPE.

107

108 **Funding:** This work was supported in part by the Emerging/Re-emerging Infectious Diseases Project  
109 of Japan, from the Japan Agency for Medical Research and Development, AMED under grant  
110 numbers JP19fk0108104 and JP19fk0108110, and Japan's National Center for Global Health and  
111 Medicine (grant number 20A2003D).

112 **Ethical Approval:** This study was reviewed and approved by the Ethics Committee of the Center  
113 Hospital of the National Center for Global Health and Medicine. Written informed consent was

114 obtained from all participants.

115 **Acknowledgement:** The authors acknowledge BZ, KT, FN, NM, JL, YG, YO, JK, ST, and BS for  
116 their help in sample collection.

117 **Conflict of Interest:** None to declare.

118

## 119 **References**

120 1. World Health Organization. Rational use of personal protective equipment (PPE) for coronavirus  
121 disease (COVID-19): interim guidance, 19 March 2020. Available at  
122 <<https://apps.who.int/iris/handle/10665/331498>> Accessed August 15, 2020.

123 2. Centers for Disease Control and Prevention. Interim infection prevention and control  
124 recommendations for patients with suspected or confirmed coronavirus disease 2019 (COVID-19) in  
125 healthcare settings. Available at  
126 <<https://www.cdc.gov/coronavirus/2019-ncov/hcp/infection-control-recommendations.html>>  
127 Accessed August 15, 2020.

128 3. Anelli F, Leoni G, Monaco R, et al. Italian doctors call for protecting healthcare workers and  
129 boosting community surveillance during covid-19 outbreak. *BMJ*. 2020;368:m1254.

130 4. Hayakawa K, Kutsuna S, Kawamata T, et al. SARS-CoV-2 infection among returnees on charter  
131 flights to Japan from Hubei, China: a report from National Center for Global Health and Medicine.  
132 *Glob Health Med*. 2020;2:107-111.

133 5. Suzuki T, Hayakawa K, Ainai A, et al. Effectiveness of personal protective equipment in  
134 preventing severe acute respiratory syndrome coronavirus 2 infection among healthcare workers. *J*  
135 *Infect Chemother*. in press.

136 6. National Institute of Infectious Diseases. *Infect Agents Surveillance Rep*. 2020; 41:76-77.  
137 Available at

- 138 <<https://www.niid.go.jp/niid/ja/diseases/ka/corona-virus/2019-ncov/2488-idsc/iasr-news/9525-483p0>  
139 1.html> Accessed August 15, 2020. Japanese.
- 140 7. National Institute of Infectious Diseases. Infect Agents Surveillance Rep. 2020; 41:78-79.  
141 Available at  
142 <<https://www.niid.go.jp/niid/ja/diseases/ka/corona-virus/2019-ncov/2488-idsc/iasr-news/9527-483p0>  
143 2.html> Accessed August 15, 2020. Japanese.
- 144 8. National Institute of Infectious Diseases. Infect Agents Surveillance Rep. 2020; 41:79-80.  
145 Available at  
146 <<https://www.niid.go.jp/niid/ja/diseases/ka/corona-virus/2019-ncov/2488-idsc/iasr-news/9528-483p0>  
147 3.html> Accessed August 15, 2020. Japanese.
- 148 9. National Institute of Infectious Diseases. Infect Agents Surveillance Rep. 2020; 41:80-82.  
149 Available at  
150 <<https://www.niid.go.jp/niid/ja/diseases/ka/corona-virus/2019-ncov/2488-idsc/iasr-news/9557-483p0>  
151 4.html> Accessed August 15, 2020. Japanese.
- 152 10. Wang W, Min Y, Yang C, et al. Association of Personal Protective Equipment Use with  
153 Successful Protection against COVID-19 Infection among Health Care Workers. medRxiv  
154 2020.04.24.20070169.
- 155 11. Liu M, Cheng SZ, Xu KW, et al. Use of personal protective equipment against coronavirus  
156 disease 2019 by healthcare professionals in Wuhan, China: cross sectional study. BMJ.  
157 2020;369:m2195.
- 158 12. Zhao J, Yuan Q, Wang H, et al. Antibody responses to SARS-CoV-2 in patients of novel



159 coronavirus disease 2019. Clin Infect Dis. 2020;ciaa344.

160

161

**Table 1. Characteristics of participants and timing of blood sampling**

| Characteristics of participants |                                     |                                               |                   |                                |                                                 |
|---------------------------------|-------------------------------------|-----------------------------------------------|-------------------|--------------------------------|-------------------------------------------------|
| No.                             | Number of participated<br>Operation | Content of operation                          | PPE<br>compliance | Any symptom after<br>operation | Other potential<br>exposure to<br>COVID-19 case |
| 1                               | 4                                   | Lead patients, triage                         | 80                | No                             | No                                              |
| 2                               | N/A                                 | N/A                                           | N/A               | N/A                            | N/A                                             |
| 3                               | 2                                   | Interview, collect specimen, lead<br>patients | 90                | No                             | No                                              |
| 4                               | 5                                   | Interview                                     | 90                | Yes                            | Yes                                             |
| 5                               | 1                                   | Interview, collect specimen                   | 80                | Yes                            | No                                              |
| 6                               | 4                                   | Interview, lead patients                      | 100               | No                             | Yes                                             |

|    |     |                          |     |     |     |
|----|-----|--------------------------|-----|-----|-----|
| 7  | N/A | N/A                      | N/A | N/A | N/A |
| 8  | 2   | Reception, lead patients | 70  | No  | No  |
| 9  | 2   | Reception, lead patients | 90  | No  | No  |
| 10 | 1   | Lead patients            | 90  | No  | No  |

N/A: not applicable (no response to questionnaire). PPE compliance was self-reported.
